# Supplementary material
Source: publisher figshare collection journal article supplement (https://tandf.figshare.com/ndownloader/files/22353597)
Supplement: Supplementary file 1 [file 22353597]

Supplemental material 1. Data of *Mesamphiagrion laterale* for Crimea.

|  | Time (minutes) | | | | Temperature (°C) | | | Hour | |
| --- | --- | --- | --- | --- | --- | --- | --- | --- | --- |
| Activity | N | Range | Mean | SD | Range | Mean | SD | DS | RS |
| Daily activity | 905 | 50-135 | - | - | - | - | - | 10:45 to 13:30 | 12:10 to 13:00 |
| Perch Grass | 905 | 1-10 | 5.60 | 2.84 | 6-25 | 15.25 | 5.67 | 9:30 to 17:00 | 10:30 to 16:00 |
| Perch trees | 456 | 5-8 | 6.55 | 1.12 | 6-25 | 15.79 | 5.76 |
| Perch Garbage | 16 | 1-5 | 3.18 | 1.32 | 12-20 | 15.37 | 2.72 | 11:00 to 16:15 | 12:00 to 12:35 |
| Perch Ground | 15 | 1-5 | 9.57 | 4.23 | 12-20 | 14.85 | 2.56 |
| Foraging | 436 | 3-9 | 6.27 | 1.99 | 12-25 | 18.97 | 3.98 | 11:30 to 14:00 | 12:30 to 13:35 |
| As prey | 7 | 5-15 | 10.57 | 2.57 | 6-24 | 14.42 | 7.23 | 8:00 to 18:00 | |
| Interspecific siege | 28 | ≤1 | 0.45 | 0.30 | 16-25 | 20.65 | 3.33 | 9:00  to 14:00 | 11:00 to 12:15 |
| Intraspecific siege | 154 | ≤1 | 0.45 | 0.27 | 6-25 | 15.75 | 5.76 | 11:00 to 12:15 |
| Oviposition/Partner Surveillance | 8 | 12-15 | 13.37 | 1.06 | 15-25 | 19.00 | 3.20 | 12:00 to 13:00 | 11:55 to 12:15 |
| Tandem mature male/ immature female | 12 | 3-15 | 8.37 | 4.19 | 15-25 | 19.91 | 3.17 |  | 11:30 to 12:20 |
| Tandem immature male/ Mature female | 3 | 1-3 | 1.60 | 0.89 | 19-25 | 21.8 | 2.38 | 11:00 to 15:00 |  |
| Tandem mature male/ mature female | 43 | 4-35 | 18.71 | 9.60 | 15-25 | 19.84 | 9.67 | 10:00 to 14:00 | 12:00 to 12:50 |
| Copulation | 3 | 7-15 | 10.75 | 3.50 | 15-24 | 18.75 | 4.50 |  | 11:00 to 12:15 |

N – Number of events observed, DS – Dry Season, RS – Rainy Season, SD – Standard Deviation.

Supplemental material 2. Data of *Mesamphiagrion laterale* for El Abuelo.

|  | Time (minutes) | | | | Temperature (°C) | | | Hour | |
| --- | --- | --- | --- | --- | --- | --- | --- | --- | --- |
| Activity | N | Range | Mean | SD | Range | Mean | SD | DS | RS |
| Daily activity | 931 | 50-120 | - | - | - | - | - | 10:45 to 13:30 | 12:10 to 13:00 |
| Perch Grass | 931 | 1-9 | 5.00 | 2.59 | 6-25 | 15.38 | 5.65 | 9:30 to 17:00 | 10:30 to 16:00 |
| Perch trees | 231 | 1-5 | 2.94 | 1.44 | 6-25 | 15.19 | 6.17 |
| Perch Garbage | 7 | 1-5 | 3.85 | 1.46 | 12-18 | 14.57 | 1.81 | 11:00 to 16:15 | 12:00 to 12:35 |
| Perch Ground | 34 | 1-5 | 0.05 | 1.51 | 12-20 | 16.11 | 2.49 |
| Predation | 418 | 2-15 | 8.88 | 4.14 | 12-25 | 19.33 | 3.91 | 11:30 to 14:00 | 12:30 to 13:35 |
| As prey | 18 | 5-15 | 10.61 | 2.03 | 6-24 | 12.77 | 5.28 | 8:00 to 18:00 | |
| Interspecific siege | 34 | ≤1 | 0.43 | 0.23 | 15-25 | 20.41 | 3.22 | 9:00  to 14:00 | 11:00 to 12:15 |
| Intraspecific siege | 123 | ≤1 | 0.53 | 0.26 | 6-25 | 15.39 | 5.86 | 11:00 to 12:15 |
| Oviposition/Partner Surveillance | 12 | 12-15 | 11.20 | 2.70 | 15-25 | 19.37 | 3.15 | 12:00 to 13:00 | 11:55 to 12:15 |
| Tandem mature male/ Juvenile female | 12 | 7-15 | 11.19 | 2.83 | 15-25 | 20.11 | 3.21 |  | 11:30 to 12:20 |
| Tandem Juvenile male/ Mature female | 2 | 1-3 | 2.00 | 1.00 | 17-20 | 18.33 | 1.52 | 11:00 to 15:00 |  |
| Tandem mature male/ mature female | 32 | 3-70 | 18.71 | 9.67 | 15-25 | 19.84 | 3.15 | 10:00 to 14:00 | 12:00 to 12:50 |
| Copulation | 4 | 7-15 | 10.50 | 4.94 | 21-22 | 21.50 | 0.70 |  | 11:00 to 12:15 |

N – Number of events observed, DS – Dry Season, RS – Rainy Season, SD – Standard Deviation.

Supplemental material 3. Data of *Mesamphiagrion laterale* for Tominé.

|  | Time (minutes) | | | | Temperature (°C) | | | Hour | |
| --- | --- | --- | --- | --- | --- | --- | --- | --- | --- |
| Activity | N | Range | Mean | SD | Range | Mean | SD | DS | RS |
| Daily activity | 984 | 50-135 | - | - | - | - | - | 10:45 to 13:30 | 12:10 to 13:00 |
| Perch Grass | 984 | 1-15 | 7.96 | 4.39 | 6-25 | 15.86 | 5.75 | 8:00 to 18:00 | 9:00 to 16:00 |
| Perch trees | 303 | 1-9 | 5.18 | 2.52 | 6-25 | 15.58 | 5.80 |
| Perch Garbage | 58 | 1-10 | 6.10 | 2.69 | 12-20 | 16.34 | 2.38 | 11:00 to 16:15 | 12:00 to 12:35 |
| Perch Ground | 21 | 1-3 | 2.19 | 0.81 | 12-20 | 16.42 | 2.59 |
| Predation | 495 | 3-15 | 9.21 | 4.09 | 12-25 | 19.2 | 3.88 | 11:30 to 14:00 | 12:30 to 13:35 |
| As prey | 73 | 5-15 | 8.94 | 3.79 | 6-25 | 15.09 | 5.85 | 8:00 to 18:00 | |
| Interspecific siege | 33 | ≤1 | 0.43 | 0.41 | 15-25 | 20.12 | 3.37 | 9:00  to 14:00 | 11:00 to 12:15 |
| Intraspecific siege | 346 | ≤1 | 0.49 | 0.28 | 6-25 | 15.64 | 6.04 | 11:00 to 12:15 |
| Oviposition/Partner Surveillance | 18 | 12-15 | 13.83 | 1.11 | 15-25 | 21.00 | 3.59 | 12:00 to 13:00 | 11:55 to 12:15 |
| Tandem mature male/ Juvenil female | 12 | 7-15 | 11.19 | 2.83 | 15-25 | 20.11 | 3.21 |  | 11:30 to 12:20 |
| Tandem Juvenil male/ Mature female | 3 | 1-3 | 2.08 | 0.79 | 16-23 | 19.66 | 2.49 | 11:00 to 15:00 |  |
| Tandem mature male/ mature female | 80 | 3-90 | 46.95 | 26.80 | 15-25 | 19.78 | 3.06 | 10:00 to 14:00 | 12:00 to 12:50 |
| Copulation | 3 | 7-15 | 11.16 | 2.92 | 15-25 | 20.5 | 3.39 |  | 11:00 to 12:15 |

N – Number of event observed, DS – Dry Season, RS – Rainy Season, SD – Standard Deviation.

Supplemental material 4. Co-occurring species data.

| Species | N | AS | H | HB | | | PP % | | | D % | | |
| --- | --- | --- | --- | --- | --- | --- | --- | --- | --- | --- | --- | --- |
| P | W | I | High | Medium | Low | PA | Sh | M |
| *Sympetrum gilvum* | 24 | 55 | 11:00 to 13:30 | 3 | 5 | 16 | 100 | - | - | 83.3 | 16.7 | - |
| *Erythrodiplax abjecta* | 231 | 55 | 9:00 to 18:00 | 219 | 2 | 10 | 23.3 | 76.7 |  | - | 100 | - |
| *Rhionaeschna marchali* | 11 | 6 | 11:00 to 13:30 | 2 | 4 | 5 | 100 | - | - | - | 54.5 | 45.5 |
| *Enallagma civile* | 18 | 8 | 11:00 to 16:15 | 1 | 4 | 13 | 33.3 | 16.6 | 50 | 16.6 | 83.4 | - |
| *Ischnura cruzi* | 53 | 1 | 10:00 to 18:00 | 32 | 11 | 12 | 30.1 | 69.9 | - | 24.5 | 75.5 | - |
| *Ischnura chingaza* | 152 | - | 10:00 to 18:00 | 101 | 25 | 26 | 32.9 | 67.1 | - | 14.4 | 85.6 | - |
| *Mesamphiagrion laterale* | 2820 | 623 | 9:00 to 18:00 | 905 | 931 | 984 | 25 | 68.2 | 6.8 | - | - | - |

N, number of individuals observed; HB, number individuals observed by habitat (P, pond; W, wetland; I, impoundment); AS, number of attacks on *M. laterale*; H, time of the day when the event was observed; PP, % of individuals found at a determined position on the perch; D, % of individuals found at a distance from the pond shore, PA, Inside Perch Area; Sh: Shore of body of water; M, Macrophytes inside of body of water.
